# Supplementary material for: Binding of monomeric and dimeric Concanavalin A to mannose-functionalized dendrimers
Source: Royal Society of Chemistry journal article supplement (doi:10.1039/b600066e), 2006-01-01
Supplement: b600066e.pdf [file b600066e.pdf]

---

## Binding of monomeric and dimeric Concanavalin A to mannose functionalized dendrimers

---

Shane L. Mangold and Mary J. Cloninger\*

*Department of Chemistry and Biochemistry and Center for Bioinspired Nanomaterials, 108 Gaines Hall, Montana State University, Bozeman, Montana 59717, USA. Fax: 406 994 5407; Tel: 406 994 3051; E-mail: mcloninger@chemistry.montana.edu*

### ***Supporting Information***

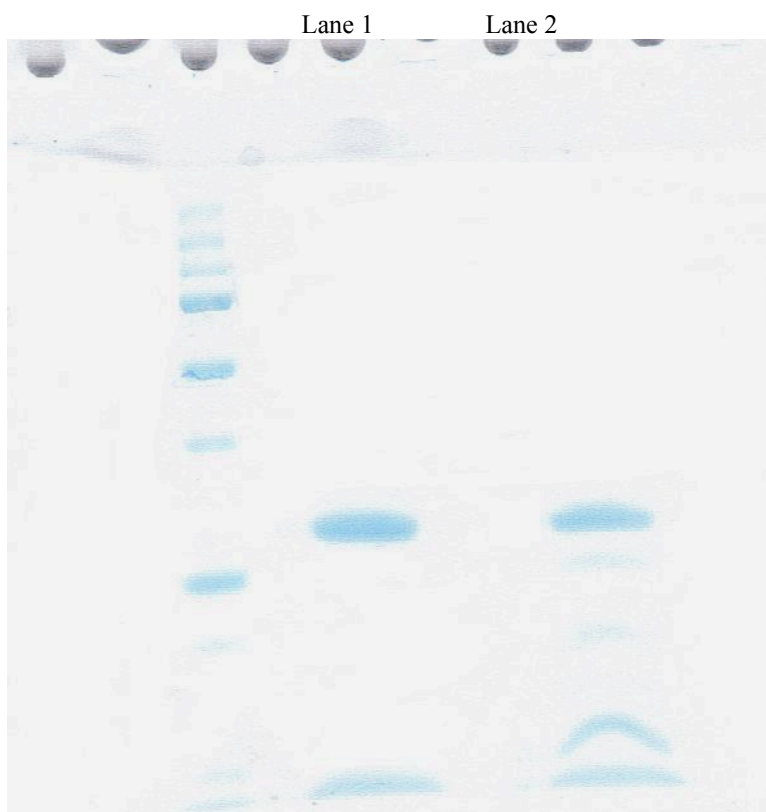

Figure S1: SDS-PAGE of purified monomeric Con A (Lane 1) and native, tetrameric Con A (Lane 2). Electrophoresis was performed on a 12% gel in 0.20 M tris-glycine, pH 8.3. Gels were stained with Coomassie blue and destained using conventional techniques. For molecular weight comparison, Precision Plus All Blue Protein Standards (Bio-Rad Laboratories) were used to generate a calibration curve.

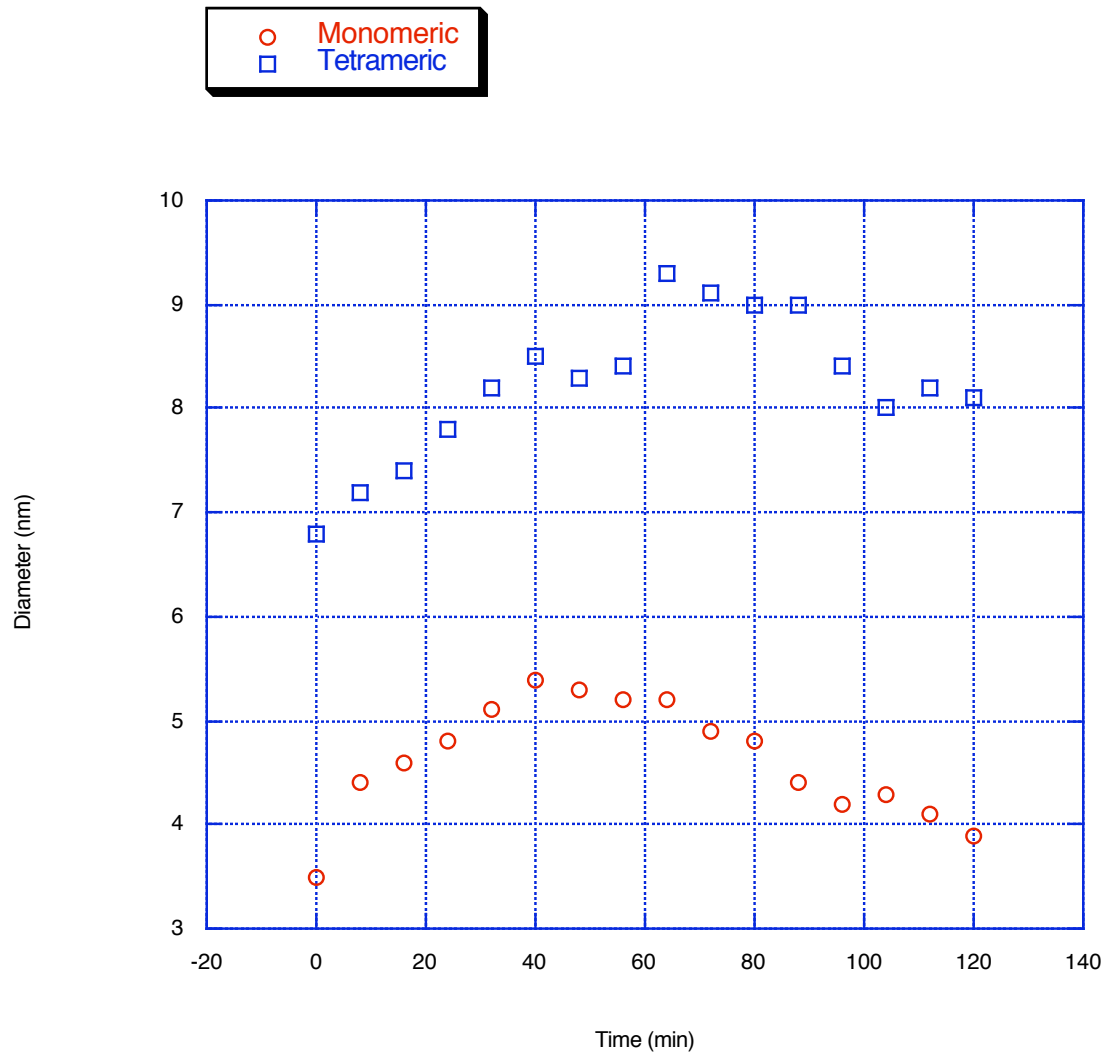

Figure S2: Dynamic Light scattering of monomeric (red circles) and tetrameric (blue squares) forms of Con A. Time course measurements of the hydrodynamic diameter were averaged over three separate trials.
